# Supplementary material
Source: PubMed Central journal article supplement (PMC2783583)

# Supporting Information

## On the Impact of Steric and Electronic Properties of Ligands on Gold(I)-Catalyzed Cycloaddition Reactions

Diego Benitez,<sup>‡</sup> Ekaterina Tkatchouk,<sup>‡</sup> Ann Z. Gonzalez,<sup>†</sup>  
William A. Goddard III<sup>‡,\*</sup> and F. Dean Toste,<sup>†,\*</sup>

*Materials and Process Simulation Center, California Institute of Technology, Pasadena, CA 91125 and  
Department of Chemistry, University of California, Berkeley, CA 94720*

| Contents                                                          | Page |
|-------------------------------------------------------------------|------|
| 1. Potential energy surface for P(Me) <sub>3</sub>                | 2    |
| 2. Reaction free energies ( $\Delta G$ ) at 298 K                 | 2    |
| 3. Natural charges for <b>TS52</b> (top) and <b>TS53</b> (bottom) | 2    |
| 4. Electronic energies, solvation and thermodynamic corrections   |      |
| AuP(Me) <sub>3</sub> AuP(Ph) <sub>3</sub> AuP(OPh) <sub>3</sub>   | 3    |
| AuP( <i>t</i> Bu) <sub>2</sub> ( <i>o</i> -biPh)                  | 4    |
| 5. Methods                                                        | 4    |
| 6. XYZ coordinates                                                |      |
| AuP(Me) <sub>3</sub>                                              | 5    |
| AuP(Ph) <sub>3</sub>                                              | 8    |
| AuP(OPh) <sub>3</sub>                                             | 12   |
| AuP( <i>t</i> Bu) <sub>2</sub> ( <i>o</i> -biPh)                  | 16   |
| 7. Experimental                                                   | 20   |

# 1. Potential energy surface for P(Me)<sub>3</sub> ligand with B3LYP and M06.

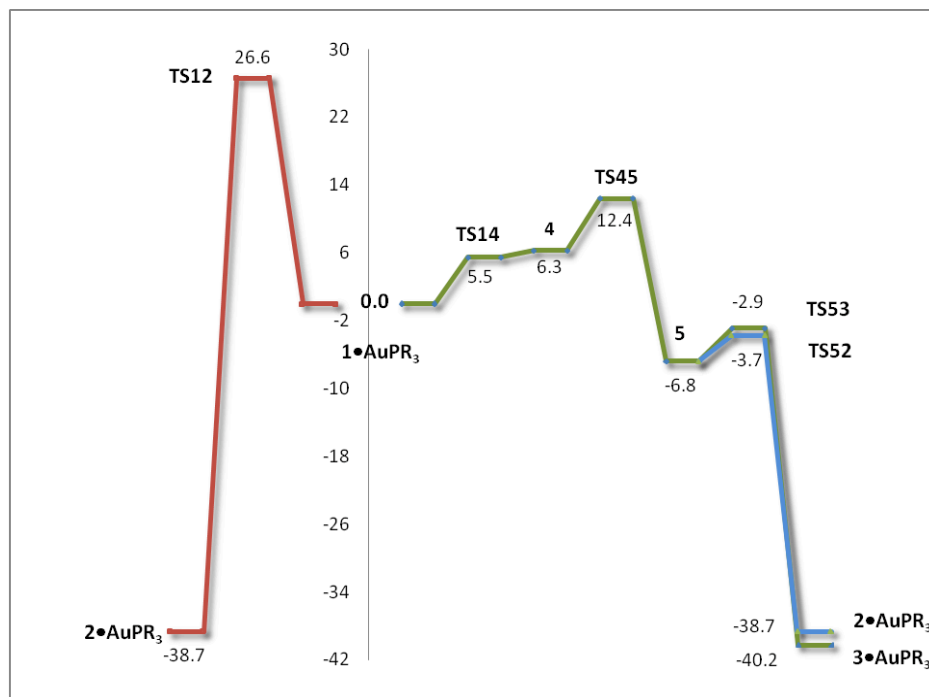

# 2. Reaction free energies ( $\Delta G$ ) at 298 K

|                           | PMe <sub>3</sub> | P(OPh) <sub>3</sub> | PPh <sub>3</sub> | P( <i>t</i> Bu) <sub>2</sub> ( <i>o</i> -biPh) |
|---------------------------|------------------|---------------------|------------------|------------------------------------------------|
| <b>TS45</b>               | 12.4             | 4.5                 | 11.7             | 15.1                                           |
| <b>5</b>                  | -6.8             | -10.7               | -9.8             | 10.1                                           |
| <b>TS52</b>               | -3.7             | -4.7                | -4.1             | -4.0                                           |
| <b>TS53</b>               | -2.8             | -3.8                | -3.8             | -7.5                                           |
| <b>2•AuPR<sub>3</sub></b> | -38.7            | -39.2               | -36.2            | -34.9                                          |
| <b>3•AuPR<sub>3</sub></b> | -40.2            | -41.2               | -38.6            | -38.5                                          |
| <b>TS12</b>               | 26.6             | 23.0                | 25.4             | ~16                                            |
| Pred. <b>2:3</b>          | 81:19            | 81:19               | 63:37            | 1:99                                           |
| Exp. <b>2:3</b>           | NA               | 100:0               | 67:33            | 4:96                                           |

# 3. Natural charges for **TS52** (top) and **TS53** (bottom).

| Ligand                                         | H           | C1    | C2           | C3          | C4           |
|------------------------------------------------|-------------|-------|--------------|-------------|--------------|
| P(OPh) <sub>3</sub>                            | 0.22        | -0.30 | -0.06        | -0.03       | -0.42        |
| PPh <sub>3</sub>                               | 0.21        | -0.28 | <b>-0.23</b> | <b>0.17</b> | <b>-0.37</b> |
| P( <i>t</i> Bu) <sub>2</sub> ( <i>o</i> -biPh) | 0.22        | -0.31 | -0.02        | -0.08       | -0.46        |
| P(OPh) <sub>3</sub>                            | 0.35        | 0.05  | -0.27        | -0.10       | -0.44        |
| PPh <sub>3</sub>                               | 0.35        | 0.05  | -0.26        | -0.10       | -0.44        |
| P( <i>t</i> Bu) <sub>2</sub> ( <i>o</i> -biPh) | <b>0.37</b> | 0.02  | <b>-0.29</b> | -0.10       | -0.44        |

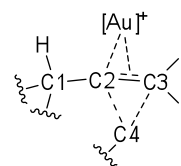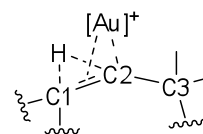

#### 4. Electronic energies, solvation and thermodynamic corrections

| Au Ligand<br>P(Me) <sub>3</sub> | Single Point Gas Phase<br>M06 LACV3P**++(2f) | LACVP** CH <sub>3</sub> Cl <sub>2</sub> | LACVP** gas phase Optimization M06 |           |                  | G(kcal/mol)   |
|---------------------------------|----------------------------------------------|-----------------------------------------|------------------------------------|-----------|------------------|---------------|
|                                 | E <sub>SCF</sub>                             | V <sub>solv</sub>                       | H <sub>vib</sub>                   | ZPE       | S <sub>vib</sub> |               |
| 1·AuP(Me) <sub>3</sub>          | -1519.73495                                  | -41.18830                               | 19.62900                           | 292.80700 | 128.17638        | -953411.66294 |
| TS14                            | -1519.72316                                  | -41.14450                               | 19.25800                           | 292.10300 | 131.20797        | -953406.19918 |
| 4                               | -1519.72865                                  | -38.72310                               | 19.16600                           | 293.37600 | 128.98822        | -953405.38350 |
| TS45                            | -1519.72367                                  | -37.40500                               | 18.37900                           | 293.77600 | 122.01968        | -953399.25197 |
| 5                               | -1519.75950                                  | -38.50590                               | 17.51100                           | 296.92600 | 115.06144        | -953418.48045 |
| TS12                            | -1519.699958                                 | -38.1073                                | 18.358                             | 293.692   | 121.5047494      | -953385.02482 |
| 2·AuP(Me) <sub>3</sub>          | -1519.81065                                  | -38.32280                               | 17.64200                           | 297.33300 | 116.62973        | -953450.32294 |
| TS52                            | -1519.75331                                  | -37.82220                               | 17.55500                           | 295.63200 | 115.87295        | -953415.40548 |
| 3·AuP(Me) <sub>3</sub>          | -1519.81355                                  | -37.96630                               | 17.57300                           | 297.04900 | 115.72941        | -953451.87178 |
| TS53                            | -1519.74764                                  | -39.47090                               | 17.42300                           | 294.32800 | 114.56164        | -953414.54226 |

| Au Ligand<br>P(Ph) <sub>3</sub> | Single Point Gas Phase<br>M06 LACV3P**++(2f) | LACVP** CH <sub>3</sub> Cl <sub>2</sub> | LACVP** gas phase Optimization M06 |           |                  | G(kcal/mol)    |
|---------------------------------|----------------------------------------------|-----------------------------------------|------------------------------------|-----------|------------------|----------------|
|                                 | E <sub>SCF</sub>                             | V <sub>solv</sub>                       | H <sub>vib</sub>                   | ZPE       | S <sub>vib</sub> |                |
| 1·Au P(Ph) <sub>3</sub>         | -2094.63072                                  | -36.20330                               | 25.50300                           | 393.87800 | 174.73417        | -1314066.22569 |
| 4                               | -2094.62241                                  | -35.22640                               | 25.23500                           | 394.09400 | 183.59200        | -1314062.72289 |
| TS45                            | -2094.61565                                  | -36.74340                               | 24.29300                           | 394.84100 | 164.39102        | -1314054.47500 |
| 5                               | -2094.65737                                  | -35.56400                               | 22.94800                           | 397.78500 | 158.18833        | -1314076.02894 |
| TS12                            | -2094.59564                                  | -35.19370                               | 24.34700                           | 394.41700 | 164.51026        | -1314040.77285 |
| 2·Au P(Ph) <sub>3</sub>         | -2094.69969                                  | -36.02340                               | 23.66700                           | 398.15600 | 159.70024        | -1314102.40096 |
| TS52                            | -2094.64383                                  | -37.55970                               | 23.50200                           | 396.72100 | 158.25538        | -1314070.05561 |
| 3·Au P(Ph) <sub>3</sub>         | -2094.70356                                  | -35.54800                               | 22.94600                           | 398.00900 | 158.23801        | -1314104.78885 |
| TS53                            | -2094.64037                                  | -37.97210                               | 22.83900                           | 395.12400 | 157.60378        | -1314070.36298 |

| Au Ligand<br>P(OPh) <sub>3</sub> | Single Point Gas Phase<br>M06 LACV3P**++(2f) | LACVP** CH <sub>3</sub> Cl <sub>2</sub> | LACVP** gas phase Optimization M06 |           |                  | G(kcal/mol)    |
|----------------------------------|----------------------------------------------|-----------------------------------------|------------------------------------|-----------|------------------|----------------|
|                                  | E <sub>SCF</sub>                             | V <sub>solv</sub>                       | H <sub>vib</sub>                   | ZPE       | S <sub>vib</sub> |                |
| 1·Au P(OPh) <sub>3</sub>         | -2320.30462                                  | -37.86810                               | 25.55600                           | 401.59300 | 182.61400        | -1455675.01159 |
| 4                                | -2320.30721                                  | -36.80340                               | 26.40600                           | 401.95700 | 192.83800        | -1455677.40163 |
| TS45                             | -2320.29636                                  | -38.95260                               | 25.57500                           | 402.38300 | 184.13000        | -1455670.55186 |
| 5                                | -2320.33063                                  | -36.99960                               | 24.74100                           | 405.38900 | 176.90800        | -1455685.78048 |
| TS12                             | -2320.27163                                  | -35.62540                               | 25.59700                           | 402.08100 | 184.08600        | -1455651.97642 |
| 2·Au P(OPh) <sub>3</sub>         | -2320.37470                                  | -37.55610                               | 24.94600                           | 405.80800 | 179.59000        | -1455714.16815 |
| TS52                             | -2320.32157                                  | -35.28910                               | 24.66900                           | 402.76300 | 169.45474        | -1455678.86266 |
| 3·Au P(OPh) <sub>3</sub>         | -2320.37811                                  | -36.88530                               | 25.21200                           | 405.79100 | 182.49800        | -1455716.25332 |
| TS53                             | -2320.31994                                  | -37.94710                               | 24.86100                           | 404.09500 | 171.95096        | -1455679.71366 |

| Au Ligand<br>P( <i>t</i> Bu) <sub>2</sub> ( <i>o</i> -biPh) | Single Point Gas<br>Phase M06<br>LACV3P++*(2f) | LACVP**<br>CH <sub>2</sub> Cl <sub>2</sub> | LACVP** gas phase Optimization M06 |           |                  | G(kcal/mol)    |
|-------------------------------------------------------------|------------------------------------------------|--------------------------------------------|------------------------------------|-----------|------------------|----------------|
|                                                             | E <sub>SCF</sub>                               | V <sub>solv</sub>                          | H <sub>vib</sub>                   | ZPE       | S <sub>vib</sub> |                |
| 1·Au( <i>t</i> Bu) <sub>2</sub> ( <i>o</i> -biPh)           | -2178.0515                                     | -33.89                                     | 29.38                              | 484.49    | 205.32           | -1366325.90042 |
| 4                                                           | -2178.0422                                     | -35.05                                     | 29.13                              | 484.44    | 202.68           | -1366320.73092 |
| TS45                                                        | -2178.034098                                   | -35.52                                     | 27.29                              | 485.70    | 183.01           | -1366310.82569 |
| 5                                                           | -2178.07685                                    | -34.73860                                  | 27.47100                           | 488.13900 | 188.81300        | -1366335.97573 |
| TS12                                                        | -2178.0294                                     | -35.68                                     | 27.39                              | 487.41    | 190.95           | -1366308.61375 |
| 2·Au( <i>t</i> Bu) <sub>2</sub> ( <i>o</i> -biPh)           | -2178.11737                                    | -35.41650                                  | 27.48000                           | 488.83400 | 186.83400        | -1366360.78449 |
| TS52                                                        | -2178.066869                                   | -35.3678                                   | 26.817                             | 487.284   | 182.323          | -1366329.91558 |
| 3·Au( <i>t</i> Bu) <sub>2</sub> ( <i>o</i> -biPh)           | -2178.12450                                    | -34.51720                                  | 27.40900                           | 488.57000 | 185.69500        | -1366364.35464 |
| TS53                                                        | -2178.06866                                    | -35.39160                                  | 27.20200                           | 485.52700 | 185.57700        | -1366333.40244 |

## 5. Methods

Calculations were performed using density functional theory (DFT) with the M06 functional, as implemented in Jaguar 7.6.<sup>1</sup> All calculations used the Hay and Wadt small core-valence relativistic effective-core-potential<sup>2</sup> (ECP). The LACVP\*\* basis set was used for all geometry optimizations and LACV3P++\*(2f) for energies. LACV3P++\*(2f) utilizes the LACV3P++\* basis set as implemented in Jaguar plus a double-zeta f-shell with exponents from Martin and Sundermann.<sup>3</sup> All electrons were described for all other atoms using the 6-31G\*\* or 6-311++G\*\* basis sets.<sup>4,5</sup> For each optimized structure, the M06 analytic Hessian was calculated to obtain the vibrational frequencies, which in turn were used to obtain the zero point energies and free energy corrections (without translational or rotational components). Solvent corrections were based on single point self-consistent Poisson-Boltzmann continuum solvation calculations for CH<sub>2</sub>Cl<sub>2</sub> ( $\epsilon = 8.93$  and  $R_0 = 2.33$  Å using the PBF<sup>6</sup> module in Jaguar.

1. Jaguar 7.6, Schrodinger, LLC, New York, NY (2006).
2. Hay, P. J.; Wadt, W. R. *J. Chem. Phys.* **1985**, *82*, 299–310.
3. Martin, J. M. L.; Sundermann, A. *J. Chem. Phys.* **2001**, *114*, 3408–3420.
4. Krishnan, R.; Binkley, J. S.; Seeger, R.; Pople, J. A. *J. Chem. Phys.* **1980**, *72*, 650–654.
5. Frisch, M. J.; Pople, J. A.; Binkley, J. S. *J. Chem. Phys.* **1984**, *80*, 3265–3269.
6. Tannor, D. J. *et al. J. Am. Chem. Soc.* **1994**, *116*, 11875–11882.





# TS52

|      |               |               |               |
|------|---------------|---------------|---------------|
| C1   | 0.0084903770  | -0.2669885806 | 0.0207815568  |
| C2   | -0.0113623290 | 0.0273742659  | 1.3971384188  |
| C10  | 1.3113137120  | -0.3036703232 | -0.7170891675 |
| C14  | -1.1586220128 | -0.8233767623 | -0.7437861079 |
| C5   | -1.2336979518 | -0.2505366331 | 2.2350723182  |
| Au29 | 1.7503974911  | 0.2566687328  | 2.5846192137  |
| C4   | -1.6894445342 | 1.0154746481  | 2.9804815166  |
| C6   | -1.0593998390 | -1.3148660362 | 3.3376276110  |
| P30  | 3.4932226539  | 0.3652632263  | 4.1871770996  |
| C18  | -2.6082536498 | 0.4519434720  | 4.0521296370  |
| C23  | -2.2521205598 | 1.9706851747  | 1.9860456903  |
| C19  | -1.8183961915 | -0.7624843504 | 4.5752453473  |
| C31  | 3.1852907933  | 1.6179849683  | 5.4759533255  |
| C35  | 5.1939087844  | 0.6889671439  | 3.6120413667  |
| C39  | 3.5991266371  | -1.2005926587 | 5.1146682455  |
| C24  | -1.6558025256 | 2.1442915521  | 0.8023607635  |
| C43  | -2.7390194960 | -1.8296534117 | 5.1509699811  |
| C46  | -0.8393736427 | -0.2986104506 | 5.6491307769  |
| C3   | -0.3294211863 | 1.5711983739  | 0.4289598731  |
| O44  | -3.9331471441 | -1.8693912647 | 5.0021991430  |
| O45  | -2.0180580518 | -2.7589168423 | 5.7884861922  |
| O47  | 0.3648658766  | -0.2082749819 | 5.5258938354  |
| O48  | -1.4974277882 | 0.0524115795  | 6.7502224380  |
| C49  | -2.7724747594 | -3.8433952174 | 6.3415787913  |
| C53  | -0.7044437061 | 0.5146072627  | 7.8459240070  |
| H11  | 1.6564173069  | -1.3462399838 | -0.7147798825 |
| H12  | 1.2070277076  | 0.0061177939  | -1.7629845520 |
| H13  | 2.0830924972  | 0.2936750360  | -0.2206829341 |
| H15  | -1.0618523209 | -0.6229386933 | -1.8152911857 |
| H16  | -1.1633905202 | -1.9130715233 | -0.6110009640 |
| H17  | -2.1236952865 | -0.4432287087 | -0.3993860702 |
| H22  | -2.0928171879 | -0.5563389600 | 1.6208279902  |
| H25  | -0.8028931565 | 1.4642039973  | 3.4655070137  |
| H7   | -1.4766338596 | -2.2754381433 | 3.0175931426  |
| H8   | -0.0095658940 | -1.4896636021 | 3.6008119258  |
| H20  | -3.5472042102 | 0.0852680840  | 3.6163869718  |
| H21  | -2.8688358771 | 1.1589126647  | 4.8459098793  |
| H28  | -3.1936136163 | 2.4757804557  | 2.1963773484  |
| H32  | 2.2123151802  | 1.40299737207 | 5.9303811213  |
| H33  | 3.9693296217  | 1.5777753315  | 6.2414311536  |
| H34  | 3.1621730122  | 2.6185058950  | 5.0342604437  |
| H36  | 5.4938649797  | -0.0766115140 | 2.8902296136  |
| H37  | 5.2413493611  | 1.6655645604  | 3.1210798042  |
| H38  | 5.8913013970  | 0.6781590570  | 4.4579009488  |
| H40  | 2.6159420885  | -1.4062402364 | 5.5506018444  |
| H41  | 3.8678370768  | -2.0193310831 | 4.4403486035  |
| H42  | 4.3491612550  | -1.1270823529 | 5.9111206352  |
| H27  | -2.1113557586 | 2.7860211918  | 0.0508944175  |
| H9   | -0.2231648408 | 1.6133709527  | -0.6641455684 |
| H26  | 0.5347699251  | 2.1178536523  | 0.8154828123  |
| H50  | -3.4947815422 | -3.4706075042 | 7.0726929104  |
| H51  | -3.3121205575 | -4.3743699973 | 5.5525440580  |
| H52  | -2.0469885033 | -4.5010502477 | 6.8195518234  |
| H54  | 0.0262307100  | -0.2454991928 | 8.1354532458  |
| H55  | -0.1786644815 | 1.4358234497  | 7.5765822057  |
| H56  | -1.4015448680 | 0.7037373011  | 8.6610361437  |

# TS12

|      |               |               |               |
|------|---------------|---------------|---------------|
| C1   | -0.0013209833 | -0.0124414634 | -0.0007383457 |
| C2   | 0.0050097509  | -0.0041412401 | 1.3707705402  |
| C3   | 2.2912839050  | 0.0521413256  | 2.1693492829  |
| C4   | 0.3161509067  | 0.5494924578  | 4.1768024062  |
| C5   | -0.7602911284 | -0.3088812405 | 2.4667578159  |
| C6   | -2.0096995683 | 0.3877133129  | 2.9322713561  |
| H7   | -2.8913973108 | -0.0724418461 | 2.4611392077  |
| H8   | -2.0134566617 | 1.4438604226  | 2.6307240151  |
| H9   | 2.9297639380  | -0.2742147699 | 1.3523202618  |
| C10  | 1.2137693376  | 0.2144329832  | -0.8653756839 |
| H11  | 0.9403010069  | 0.7063431368  | -1.8062247009 |
| H12  | 1.6491905860  | -0.7585791037 | -1.1331373136 |
| H13  | 1.9891153267  | 0.8090612772  | -0.3766695034 |
| C14  | -1.1867879859 | -0.5826545802 | -0.7478380614 |
| H15  | -2.0688835261 | -0.6838382263 | -0.1087666853 |
| H16  | -0.9234989231 | -1.5773876226 | -1.1336968503 |
| C18  | -1.4474644092 | 0.0342696340  | -1.6164952497 |
| C19  | -0.8251257821 | 0.7944011175  | 5.1129031595  |
| H20  | -2.1572512915 | 0.3365231904  | 4.4565814498  |
| H21  | -0.6967669469 | 0.2585881196  | 6.0591002706  |
| H22  | -0.8900406979 | 1.8680114358  | 5.3371667412  |
| H23  | -0.6565900973 | -1.3444193047 | 2.8076998679  |
| C24  | 1.2472961372  | -0.4582100096 | 4.3137531769  |
| H25  | 2.1817656838  | -0.7228204127 | 3.2962197451  |
| H26  | 0.5687251058  | 1.3946111748  | 3.5359893765  |
| H27  | 2.0542060102  | 1.1135448151  | 2.1778493305  |
| H28  | 2.7085648488  | -1.6754096202 | 3.3255330051  |
| Au29 | 1.0984821547  | -1.1940406876 | 5.1046546220  |
| P30  | -0.5290044743 | 2.1955398719  | 0.6895217459  |
| C31  | -1.2822100115 | 4.3659190847  | 1.1941570566  |
| H32  | -3.0539610957 | 4.5656623964  | 0.8291110137  |
| H33  | -3.6138516029 | 3.8149456538  | 1.3989639238  |
| H34  | -3.2469873438 | 4.4224589694  | -0.2371633285 |
| C35  | -3.3899773057 | 5.5653773700  | 1.1291430646  |
| H36  | -1.1658821679 | 4.6394647258  | 2.9921291644  |
| H37  | -1.8019306947 | 3.9038884446  | 3.5037194268  |
| H38  | -1.5178087889 | 5.6476877548  | 3.2416719463  |
| C39  | -0.1306001199 | 4.5247593312  | 3.3292583373  |
| H40  | -0.4318465186 | 5.7682852412  | 0.4061932999  |
| H41  | 0.6320388969  | 5.7494987636  | 0.6609923880  |
| H42  | -0.8691303339 | 6.7119877245  | 0.7527370352  |
| C43  | -0.5314617818 | 5.7037885977  | -0.6814727153 |
| C44  | -3.2373111201 | 1.3134077163  | 4.8907256099  |
| C45  | -2.4600487083 | -1.1006541564 | 4.8693026832  |
| O46  | -3.5251255438 | 2.3169194079  | 4.2725704921  |
| O47  | -1.6849582988 | -1.8275301293 | 5.4425653852  |
| O48  | -3.7359573273 | 0.9917996093  | 6.0763772328  |
| C49  | -3.6682081130 | -1.4711655833 | 4.4414005137  |
| H50  | -4.7019547811 | 1.9006798281  | 6.6207901305  |
| H51  | -5.5649554962 | 1.9780834618  | 5.9544337632  |
| H52  | -4.2595737021 | 2.8920843100  | 6.7502202858  |
| C53  | -4.9956733883 | 1.4826086029  | 7.5828399169  |
| H54  | -4.0478485137 | -2.8139888305 | 4.7692088300  |
| H55  | -4.0601929755 | -2.9486721422 | 5.8540202466  |
| H56  | -3.3435362243 | -3.5277512986 | 4.3332214634  |
| H57  | -5.0453348312 | -2.9539845769 | 4.3536897748  |









|     |               |                |               |
|-----|---------------|----------------|---------------|
| O48 | 2.0250570399  | 3.8446010714   | -1.0851211257 |
| C49 | 1.8877366116  | 5.3655845741   | 3.0479768683  |
| H50 | 2.6354269839  | 6.0771255265   | 2.6860878390  |
| H51 | 2.2321037160  | 4.9443542296   | 3.9967775261  |
| H52 | 0.9205146824  | 5.8528076936   | 3.1714052042  |
| C53 | 1.1630950289  | 4.4755173486   | -2.0377050788 |
| H54 | 0.4072387068  | 5.0785571416   | -1.5268271613 |
| H55 | 0.6547509338  | 3.7222177883   | -2.6507621372 |
| H56 | 1.8071729811  | 5.1029225714   | -2.6541383326 |
| X57 | 1.1897188004# | -0.7663303073# | 0.2058480330# |
| C54 | -1.7508818259 | 3.8472209852   | -4.7826127195 |
| C55 | -2.6542099182 | 4.2294323442   | -3.7956831859 |
| C56 | -2.9514798803 | 3.3650283981   | -2.7432287053 |
| C57 | -2.3375262914 | 2.1134733299   | -2.6786452915 |
| C58 | -1.4217240190 | 1.7357959320   | -3.6687257334 |
| C59 | -1.1343770964 | 2.5972199969   | -4.7202645399 |
| H60 | -1.5255826921 | 4.5228838644   | -5.6048740778 |
| H61 | -3.1350610132 | 5.2038312004   | -3.8451095288 |
| H62 | -3.6610709218 | 3.6662409174   | -1.9732766829 |
| H63 | -0.9387196160 | 0.7578233866   | -3.6127792597 |
| H64 | -0.4310172359 | 2.2954731881   | -5.4936581388 |
| C61 | -5.1040362102 | 3.2054242381   | 1.8216167304  |
| C62 | -5.7752743409 | 2.4323244926   | 0.8786212831  |
| C63 | -5.0592722902 | 1.7279149790   | -0.0850818195 |
| C64 | -3.6634399256 | 1.7978005246   | -0.1008570711 |
| C65 | -2.9892112927 | 2.5730809607   | 0.8508090094  |
| C66 | -3.7127827082 | 3.2779003494   | 1.8057231157  |
| H67 | -5.6677186481 | 3.7515125233   | 2.5748482157  |
| H68 | -6.8612258613 | 2.3744076041   | 0.8935610056  |
| H69 | -5.5877755402 | 1.1215647865   | -0.8198518479 |
| H70 | -1.8997293051 | 2.6309630691   | 0.8312594722  |
| H71 | -3.1891994585 | 3.8809954104   | 2.5442704721  |
| C68 | -5.4008681844 | -2.3466211369  | -3.0875066255 |
| C69 | -5.3532886636 | -1.1012184395  | -3.7080338244 |
| C70 | -4.5289936000 | -0.0999171729  | -3.2031938927 |
| C71 | -3.7434122195 | -0.3483275909  | -2.0736105685 |
| C72 | -3.7911770429 | -1.6038299309  | -1.4563855516 |
| C73 | -4.6226521944 | -2.5975805131  | -1.9595384301 |
| H74 | -6.0448273927 | -3.1272240840  | -3.4863541125 |
| H75 | -5.9596644968 | -0.9080336803  | -4.5899511490 |
| H76 | -4.4948601086 | 0.8744052400   | -3.6903523528 |
| H77 | -3.1732474135 | -1.8010354629  | -0.5777648382 |
| H78 | -4.6594902873 | -3.5710716411  | -1.4756677025 |







|      |               |               |               |
|------|---------------|---------------|---------------|
| C24  | 2.4911137793  | 0.2340195888  | 2.9157389570  |
| H25  | 0.4505956080  | 1.8085235192  | 3.6207857828  |
| H26  | 1.7100233252  | 2.0484597225  | 2.0518951386  |
| H27  | 3.2503949093  | -0.5312337233 | 2.7609285655  |
| H28  | 1.8418764021  | -0.6924447887 | 4.7555253578  |
| Au29 | -1.1288127750 | 2.2850363476  | 0.5129202978  |
| F30  | -2.6638216824 | 4.0443504691  | 0.6427583594  |
| C31  | -3.0247154706 | 0.7580755135  | 5.1938655648  |
| C32  | -1.8552711253 | -1.4124135944 | 4.7229820418  |
| O33  | -3.7113490839 | 1.6156118162  | 4.6858251234  |
| O34  | -0.9054003002 | -2.0897324287 | 5.0335218742  |
| O35  | -3.1646369022 | 0.3237060481  | 6.4449612766  |
| O36  | -3.0599779285 | -1.8972502688 | 4.4139752034  |
| C37  | -4.2265162483 | 0.9146581002  | 7.1998045836  |
| H38  | -5.1876118170 | 0.7353051140  | 6.7103420942  |
| H39  | -4.0720431684 | 1.9937138637  | 7.2963161797  |
| H40  | -4.2004860163 | 0.4371734166  | 8.1789757960  |
| C41  | -3.1941857027 | -3.3200849554 | 4.5227235912  |
| H42  | -2.9838558875 | -3.6434261329 | 5.5457283842  |
| H43  | -2.4985023044 | -3.8224635986 | 3.8447128814  |
| H44  | -4.2253692506 | -3.5461208212 | 4.2526105621  |
| O45  | -2.9752416167 | 4.8322985502  | -0.7245358983 |
| O46  | -4.0629646601 | 3.4687071286  | 1.1236088727  |
| O47  | -2.2603161015 | 5.2489856072  | 1.6349159371  |
| C48  | -0.0490352032 | 4.3135836401  | 5.0263510120  |
| C49  | 0.5982372194  | 4.7220038430  | 3.8621179167  |
| C50  | -0.1413275072 | 5.0241073095  | 2.7231406284  |
| C51  | -1.5247007088 | 4.9090375864  | 2.7782242165  |
| C52  | -2.1907351850 | 4.4872384753  | 3.9185813123  |
| C53  | -1.4357808711 | 4.1949463261  | 5.0511005964  |
| H54  | 0.5325519610  | 4.0862491979  | 5.9171476567  |
| H55  | 1.6815574234  | 4.8144941569  | 3.8423115935  |
| H56  | 0.3313001997  | 5.3601944065  | 1.8014671225  |
| H57  | -3.2764772901 | 4.4054434597  | 3.9190863978  |
| H58  | -1.9436527405 | 3.8767399201  | 5.9599105479  |
| C59  | 0.2989432109  | 5.0441982533  | -3.2777467115 |
| C60  | -0.6588947185 | 4.0490455191  | -3.4531782494 |
| C61  | -1.7596825046 | 3.9806480933  | -2.6052097911 |
| C62  | -1.8773645668 | 4.9274166948  | -1.5965928834 |
| C63  | -0.9396343863 | 5.9298062344  | -1.4030914163 |
| C64  | 0.1565894877  | 5.9822182719  | -2.2597107493 |
| H65  | 1.1553029912  | 5.0948956499  | -3.9452171601 |
| H66  | -0.5543517705 | 3.3259712201  | -4.2584874033 |
| H67  | -2.5302380187 | 3.2204189244  | -2.7205017339 |
| H68  | -1.0834248467 | 6.6556601006  | -0.6058489564 |
| H69  | 0.9000571543  | 6.7649095957  | -2.1326695238 |
| C70  | -7.2169439392 | 5.5860989275  | 2.8025767489  |
| C71  | -6.6881455919 | 4.4702192220  | 3.4442007931  |
| C72  | -5.6248931209 | 3.7731995033  | 2.8805336270  |
| C73  | -5.1208543337 | 4.2227880160  | 1.6706298647  |
| C74  | -5.6288004001 | 5.3240748616  | 1.0021818979  |
| C75  | -6.6884633285 | 6.0095096597  | 1.5877887403  |
| H76  | -8.0464032267 | 6.1270756747  | 3.2501868702  |
| H77  | -7.1028088987 | 4.1372367406  | 4.3922603352  |
| H78  | -5.1803308087 | 2.9017340086  | 3.3589308957  |
| H79  | -5.2130102490 | 5.6314891560  | 0.0459028284  |
| H80  | -7.1043082089 | 6.8782641378  | 1.0843093498  |
| X81  | 0.0558781024  | 0.3870650304  | 0.5965470159  |





Table of numerical data with 4 columns and 55 rows (H21 to H91).

Table of numerical data with 4 columns and 55 rows (C38 to C93).

2•AuP(tBu)2(o-biPh)

Table of numerical data for 2•AuP(tBu)2(o-biPh) with 4 columns and 31 rows (C1 to C45).

5

Table of numerical data for 5 with 4 columns and 31 rows (C1 to C45).



|     |               |               |               |     |               |              |              |
|-----|---------------|---------------|---------------|-----|---------------|--------------|--------------|
| H72 | 2.3784199579  | -3.1598112456 | 3.1958261277  | C71 | 1.9275320332  | 6.7645199916 | 5.2569350720 |
| H73 | 1.6044277978  | 0.6275353138  | 3.1069201817  | C72 | 0.5658490285  | 6.9903045055 | 5.410407515  |
| H74 | 2.2469885093  | 2.2733250893  | 3.2196350551  | C73 | -0.3379671626 | 6.0327756627 | 4.9763926802 |
| H75 | 1.2322377907  | 1.8175872111  | 1.8342239867  | C74 | 0.0811348416  | 4.8267271155 | 4.3920890116 |
| H76 | 4.1679720285  | 0.1357368531  | 3.5281926343  | C75 | 1.4641305195  | 4.5842856368 | 4.2730452204 |
| H77 | 5.3705755414  | 0.6107390908  | 2.3028567659  | C76 | 2.3611711522  | 5.5729001169 | 4.6982919517 |
| H78 | 4.5750877169  | 1.8335006751  | 3.2863916500  | H77 | 2.6515129458  | 7.5078430018 | 5.5813000171 |
| H79 | 4.6132935124  | 2.0838127677  | 0.3161897453  | H78 | 0.2041555398  | 7.9117867845 | 5.8593717788 |
| H80 | 3.7330330054  | 3.1556379972  | 1.4119916410  | H79 | -1.3974923598 | 6.2381702093 | 5.0906826335 |
| C81 | -0.3153158664 | -0.5438838749 | -3.8592230215 | H80 | 3.4274910200  | 5.3755474216 | 4.6022296756 |
| C82 | 0.3643396427  | 0.6675103104  | -3.7541456483 | C81 | 3.6831744026  | 1.1299722328 | 3.0721961018 |
| C83 | 1.6006473546  | 0.7227917449  | -3.1201959211 | C82 | 3.6965855390  | 2.2804223824 | 2.2863175941 |
| C84 | 2.1771466482  | -0.4320848735 | -2.5792858162 | C83 | 2.9172451608  | 3.3768550935 | 2.6407219708 |
| C85 | 1.4829511217  | -1.6437499315 | -2.6797813363 | C84 | 2.1055479319  | 3.3360491711 | 3.7804040578 |
| C86 | 0.2440584302  | -1.6988690390 | -3.3169202103 | C85 | 2.0796943349  | 2.1674124729 | 4.5486149495 |
| H87 | -1.2718933156 | -0.5905748109 | -4.3761234015 | C86 | 2.8682427687  | 1.0758919227 | 4.1996500369 |
| H88 | -0.0652058015 | 1.5750899862  | -4.1756947125 | H87 | 4.3123287168  | 0.2809414999 | 2.8092124251 |
| H89 | 2.1406141181  | 1.6660923310  | -3.0515685709 | H88 | 4.3351454199  | 2.3325424894 | 1.4062674528 |
| H90 | 1.9373798778  | -2.5564335468 | -2.2945120056 | H89 | 2.9532695043  | 4.2910547422 | 2.0485487722 |
| H91 | -0.2715941418 | -2.6528714685 | -3.4127633073 | H90 | 1.4709313397  | 2.1212660358 | 5.4503020826 |
| H92 | 2.8786554870  | 2.4031266322  | 0.0471322882  | H91 | 2.8489997831  | 0.1911775134 | 4.8333250460 |

## TS12

|      |               |               |               |
|------|---------------|---------------|---------------|
| C1   | -0.2654008511 | 0.0540562241  | -0.1064991485 |
| C2   | -0.1112230834 | -0.0419970175 | 1.2556931320  |
| C3   | 2.1667487768  | 0.1303349427  | 1.8068049818  |
| C4   | 0.7112317152  | -0.5431542657 | 4.1292081696  |
| C5   | -0.7354904572 | -0.6877021560 | 2.2831116599  |
| C6   | -1.9125989251 | -0.2767033038 | 3.1348183397  |
| H7   | -2.6536486836 | -1.0684995157 | 3.0472559451  |
| H8   | -2.3710481933 | 0.6173339950  | 2.7417922574  |
| H9   | 2.7144647497  | 0.3072908879  | 0.8766310062  |
| C10  | 0.8005939952  | 0.3802543964  | -1.1169618036 |
| H11  | 0.3724313745  | 0.8677981478  | -1.9936743317 |
| H12  | 1.2386561302  | -0.5641607481 | -1.4635242184 |
| H13  | 1.6092795504  | 1.0050771306  | -0.7355196610 |
| C14  | -1.5330448725 | -0.4805363205 | -0.7373470147 |
| H15  | -1.2929322839 | -1.3827784097 | -1.3066791882 |
| H16  | -1.9516523773 | 0.2365056946  | -1.4435183317 |
| H17  | -2.2948303167 | -0.7210588892 | 0.0006104110  |
| C18  | -0.3884631841 | -0.8599354178 | 5.0815706747  |
| C19  | -1.6194340557 | -0.0599983961 | 4.6403037310  |
| H20  | -0.6227720536 | -1.9264869629 | 5.0615571815  |
| H21  | -0.1528320168 | -0.6000473526 | 6.1275551274  |
| H22  | -0.5451867124 | -1.7582300941 | 2.2899124702  |
| C23  | 1.6451327663  | -1.3974105103 | 3.6157795067  |
| C24  | 2.3737815764  | -1.0413962431 | 2.4607004516  |
| H25  | 0.8356756289  | 0.5086590666  | 3.9038742774  |
| H26  | 1.8185746116  | 1.0287005932  | 2.3256627438  |
| H27  | 2.9769895984  | -1.8066954251 | 1.9729153358  |
| H28  | 1.6653089936  | -2.4279231320 | 3.9518488111  |
| Au29 | -0.5990908412 | 2.2284378147  | 0.9559264518  |
| F30  | -0.3594444092 | 4.6153114886  | 0.7711258059  |
| C31  | 0.5859256601  | 5.2803033128  | 2.2832725196  |
| C32  | -0.4413824027 | 5.4713018306  | 3.3871253081  |
| C33  | 1.3506329839  | 6.5796098376  | 2.0827138613  |
| C34  | 1.5911643191  | 4.2245942908  | 2.7528864772  |
| C35  | 0.5595574633  | 4.8513212767  | -0.8789864372 |
| C36  | -0.2877115216 | 4.1259832116  | -1.9345973632 |
| C37  | 1.9414061780  | 4.1994783033  | -0.7881669416 |
| C38  | 0.7252857584  | 6.2902267315  | -1.3736196847 |
| C39  | -2.8886379137 | -0.3541571552 | 5.4299708952  |
| O40  | -3.9547880516 | 0.1823555552  | 5.2330880114  |
| O41  | -2.6685196595 | -1.2522220390 | 6.3399088373  |
| C42  | -1.3825887347 | 1.4252203532  | 4.8967506315  |
| O43  | -1.2242083476 | 2.2759262521  | 4.0460050582  |
| O44  | -1.3671039547 | 1.6576590392  | 6.2154645523  |
| C45  | -3.7947080076 | -1.5503612173 | 7.1773504750  |
| H46  | -4.6567146990 | -1.9047021223 | 6.5770761763  |
| H47  | -4.1207689610 | -0.6598041323 | 7.7513446619  |
| H48  | -3.4304649318 | -2.3314679628 | 7.8440431474  |
| C49  | -1.1460191604 | 3.0225184276  | 6.5872315723  |
| H50  | -1.9349733230 | 3.6642194575  | 6.2064067351  |
| H51  | -0.1690989133 | 3.3655990538  | 6.1920655777  |
| H52  | -1.1379985536 | 3.0139956050  | 7.6682799560  |
| H53  | -1.146940069  | 6.2687495026  | 3.1567120747  |
| H54  | -0.9906304512 | 4.5484043487  | 3.5800961174  |
| H55  | 0.0888476711  | 5.7439786583  | 4.3211730499  |
| H56  | 2.3374728352  | 3.9623149544  | 1.9831555836  |
| H57  | 2.1506540231  | 4.6194477008  | 3.6285864334  |
| H58  | 1.0661538402  | 3.3103317220  | 3.0764775837  |
| H59  | 0.7070510920  | 7.4046013490  | 1.8117387714  |
| H60  | 1.8315679116  | 6.8524847170  | 3.0320384556  |
| H61  | 2.1439892536  | 6.4925418297  | 1.3520828382  |
| H62  | -0.2394982565 | 6.7540504345  | -1.6327596488 |
| H63  | 1.2494931889  | 6.9295541878  | -0.6557788501 |
| H64  | 1.3347622633  | 6.2727776801  | -2.2948508552 |
| H65  | 2.6375680905  | 4.7710462928  | -0.1669786149 |
| H66  | 1.8930888134  | 3.1804882002  | -0.3925346713 |
| H67  | 2.3835293050  | 4.1492320631  | -1.7883588162 |
| H68  | -1.2936674492 | 4.5408649253  | -2.0123575409 |
| H69  | 0.1810967640  | 4.2503429671  | -2.9134036057 |
| H70  | -0.3825096858 | 3.0591721801  | -1.7342894690 |
| C71  | -4.1422857412 | 7.2199840843  | 0.1511761857  |
| C72  | -2.8755896570 | 7.8023166097  | 0.2265827481  |
| C73  | -1.7700666453 | 6.9960076661  | 0.4387407117  |
| C74  | -1.8863303624 | 5.6020245288  | 0.5925514275  |
| C75  | -3.1740544912 | 5.0230546274  | 0.5473216024  |
| C76  | -4.2795596022 | 5.8501359381  | 0.3125735538  |
| H77  | -5.0200080039 | 7.8312094189  | -0.0220515865 |
| H78  | -2.7445138067 | 8.8769134580  | 0.1164320791  |
| H79  | -0.7925270975 | 7.4682855473  | 0.4855567232  |
| H80  | -5.2688341952 | 5.3880001807  | 0.2740672184  |
| C81  | -4.7240029065 | 1.1205001082  | 1.2742447097  |
| C82  | -4.3962908516 | 1.9486753094  | 2.3455080171  |
| C83  | -3.8057620062 | 3.1833356348  | 2.1077222835  |
| C84  | -3.5396329456 | 3.6001876498  | 0.8007166419  |
| C85  | -3.8625630812 | 2.7598449499  | -0.2670389963 |
| C86  | -4.4507102340 | 1.5229170561  | -0.0293298210 |
| H87  | -5.2040187643 | 0.1634864028  | 1.4590100928  |
| H88  | -4.5975708829 | 1.6339843657  | 3.3675089737  |
| H89  | -3.5718552534 | 3.8487784867  | 2.9414261529  |
| H90  | -3.6951869615 | 3.1021775647  | -1.2897312703 |
| H91  | -4.7214082673 | 0.8818592515  | -0.8679993511 |

## 6. Experimental

**(*t*-Bu)<sub>2</sub>PhPAuCl** Synthesized via a modification of a procedure reported by Puddephat.<sup>1</sup> In a 20 mL screw-top vial was dissolved (SMe<sub>2</sub>)AuCl (1 equiv) in CH<sub>2</sub>Cl<sub>2</sub> (1 M). To the resulting suspension a solution of the ligand (1.0 equiv) in CH<sub>2</sub>Cl<sub>2</sub> (1 M) was then added dropwise. The mixture was allowed to react for 1 h after which time the solvent was removed in a rotatory evaporator to yield the desired gold(I) complex as a white powder (97%).

<sup>1</sup>H NMR (400 MHz, CDCl<sub>3</sub>): δ 1.39 (s, 9H), 1.42 (s, 9H), 7.46-7.56 (m, 3H), 7.99 (bs, 2H). <sup>13</sup>C NMR (101 MHz, CDCl<sub>3</sub>): δ 30.2, 30.2, 36.3, 36.5, 127.3, 127.8, 128.5, 128.6, 131.9, 132.0. <sup>31</sup>P NMR (166 MHz, CDCl<sub>3</sub>): δ 79.0.

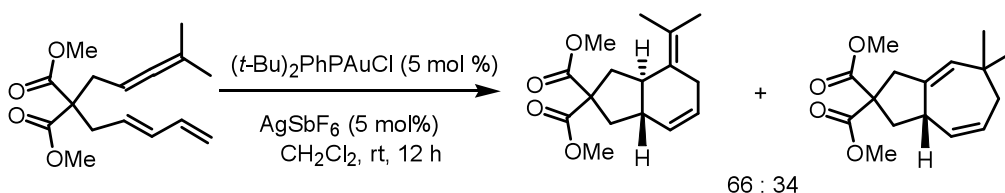

To a small vial was added AgSbF<sub>6</sub> (0.004 mmol, 1.0 mg, 0.05 equiv) and (*t*-Bu)<sub>2</sub>PhPAuCl (0.004 mmol, 2.0 mg, 0.05 equiv) in CH<sub>2</sub>Cl<sub>2</sub> (0.2 mL). The mixture was allowed to react for five minutes at room temperature, and then the suspension was filtered through glass fiber and added to a solution of the corresponding allene-diene (0.08 mmol, 1.0 equiv) in CH<sub>2</sub>Cl<sub>2</sub> (0.8 mL). <sup>1</sup>H NMR analysis of the reaction crude after 12 hrs showed the formation of a 66:34 mixture of the corresponding [4+2] and [4+3] cycloadducts respectively. The spectroscopic data for this mixture was in complete agreement with the reported literature values.<sup>2</sup>

<sup>1</sup> Brandys, M.-C.; Jennings, M. C.; Puddephat, R. J. *Dalton* **2000**, 4601.

<sup>2</sup> Maulcon, P.; Zeldin, R. M.; Gonzalez, A. Z.; Toste, F. D. *J. Am. Chem. Soc.* **2009**, *131*, 6348-6349.

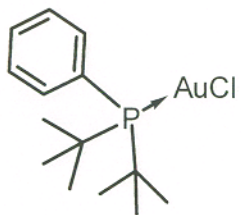

7.985  
7.564  
7.550  
7.545  
7.528  
7.493  
7.475  
7.456  
7.269

1.424  
1.385

```

NAME      08-01-09-AG02-p102
EXPNO     1
PROCNO    1
Date_     20090801
Time      12.58
INSTRUM   AVQ-400
PROBHD    5 mm QNP 1H/13
PULPROG   zg30
TD        65536
SOLVENT   CDCl3
NS        8
DS        0
SWH       8012.820 Hz
FIDRES    0.122266 Hz
AQ        4.0899586 sec
RG        161.3
DW        62.400 usec
DE        6.00 usec
TE        293.2 K
D1        1.00000000 sec
TDO       1

```

```

===== CHANNEL f1 =====
NUC1      1H
P1        12.80 usec
PL1       0.00 dB
PL1W      9.54516888 W
SFO1      400.1324700 MHz
SI        65536
SF        400.1300142 MHz
WDW       EM
SSB       0
LB        0.30 Hz
GB        0
PC        4.00

```

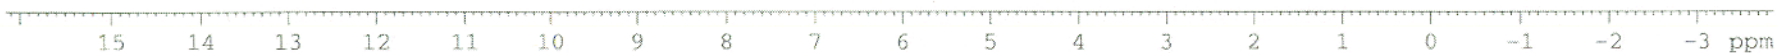

1.90  
3.35

18.00

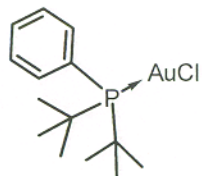

78.99

```

NAME      08-01-09-AG02-p102
EXPNO     2
PROCNO    1
Date_     20090801
Time      13.00
INSTRUM   AVQ-400
PROBHD    5 mm QNP 1H/13
PULPROG   zgpg30
TD        65536
SOLVENT   CDCl3
NS        23
DS        0
SWH       97087.375 Hz
FIDRES    1.481436 Hz
AQ        0.3375655 sec
RG        8192
DW        5.150 usec
DE        6.00 usec
TE        293.3 K
D1        2.00000000 sec
D11       0.03000000 sec
TDO       1
  
```

```

===== CHANNEL f1 =====
NUC1      31P
P1        7.70 usec
PL1       -2.00 dB
PL1W      16.27507401 W
SFO1      161.9814041 MHz
  
```

```

===== CHANNEL f2 =====
CPDPRG2   waltz16
NUC2      1H
PCPD2     70.00 usec
PL2       0.00 dB
PL12      15.00 dB
  
```

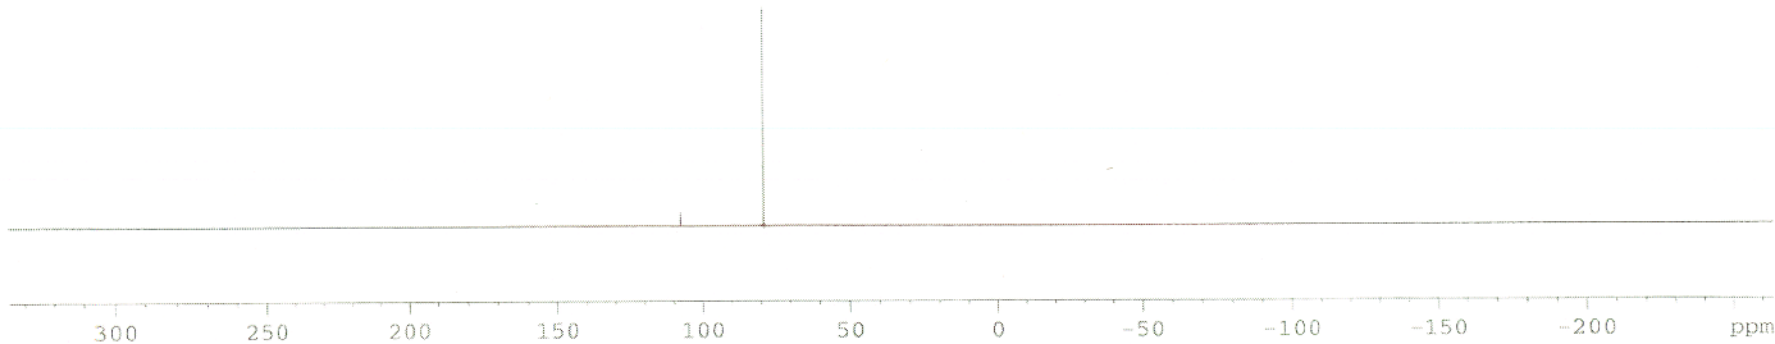

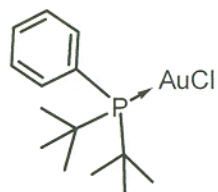

131.95  
131.92  
128.63  
128.52  
127.80  
127.32

77.33  
77.01  
76.70

36.52  
36.26  
30.21  
30.15

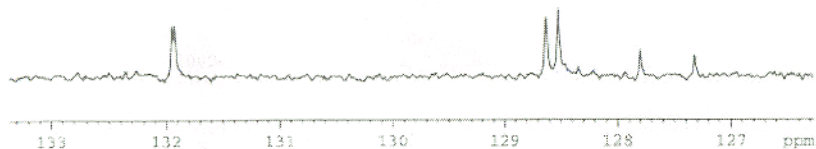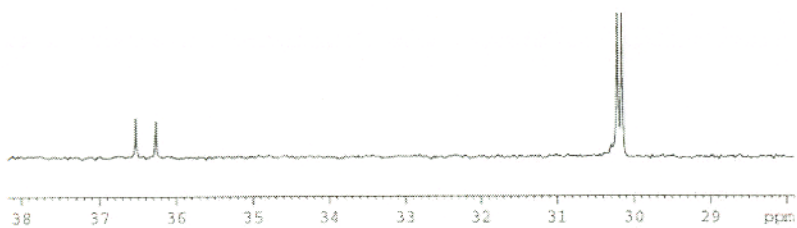

NAME 08-01-09-AG02-p102  
EXPNO 3  
PROCNO 1  
Date\_ 20090801  
Time 13.29  
INSTRUM AVQ-400  
PROBHD 5 mm QNP 1H/13  
PULPROG zgpg30  
TD 65536  
SOLVENT CDCl3  
NS 500  
DS 0  
SWH 34038.461 Hz  
FIDRES 0.366798 Hz  
AQ 1.3632196 sec  
RG 16384  
DW 20.800 usec  
DE 6.00 usec  
TE 293.9 K  
D1 2.00000000 sec  
D11 0.03000000 sec  
TD0 1

==== CHANNEL f1 =====  
NUC1 13C  
P1 6.50 usec  
PL1 -2.00 dB  
PL1W 47.77286148 W  
SFO1 100.6228298 MHz

==== CHANNEL f2 =====  
CPDPRG2 waltz16  
NUC2 1H  
PCPD2 70.00 usec  
PL2 0.00 dB  
PL12 15.00 dB

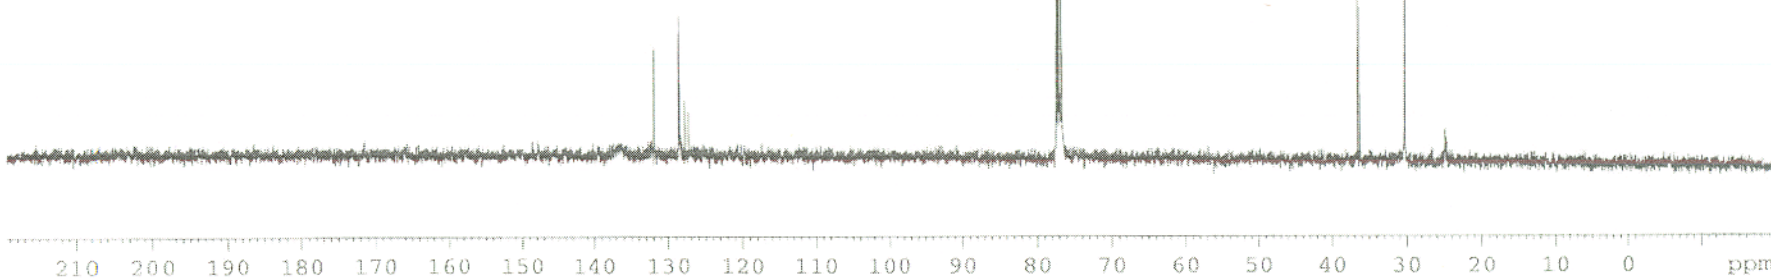

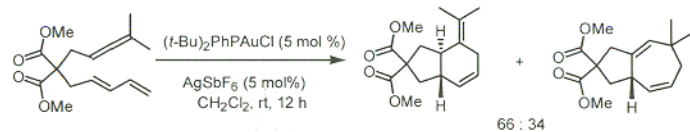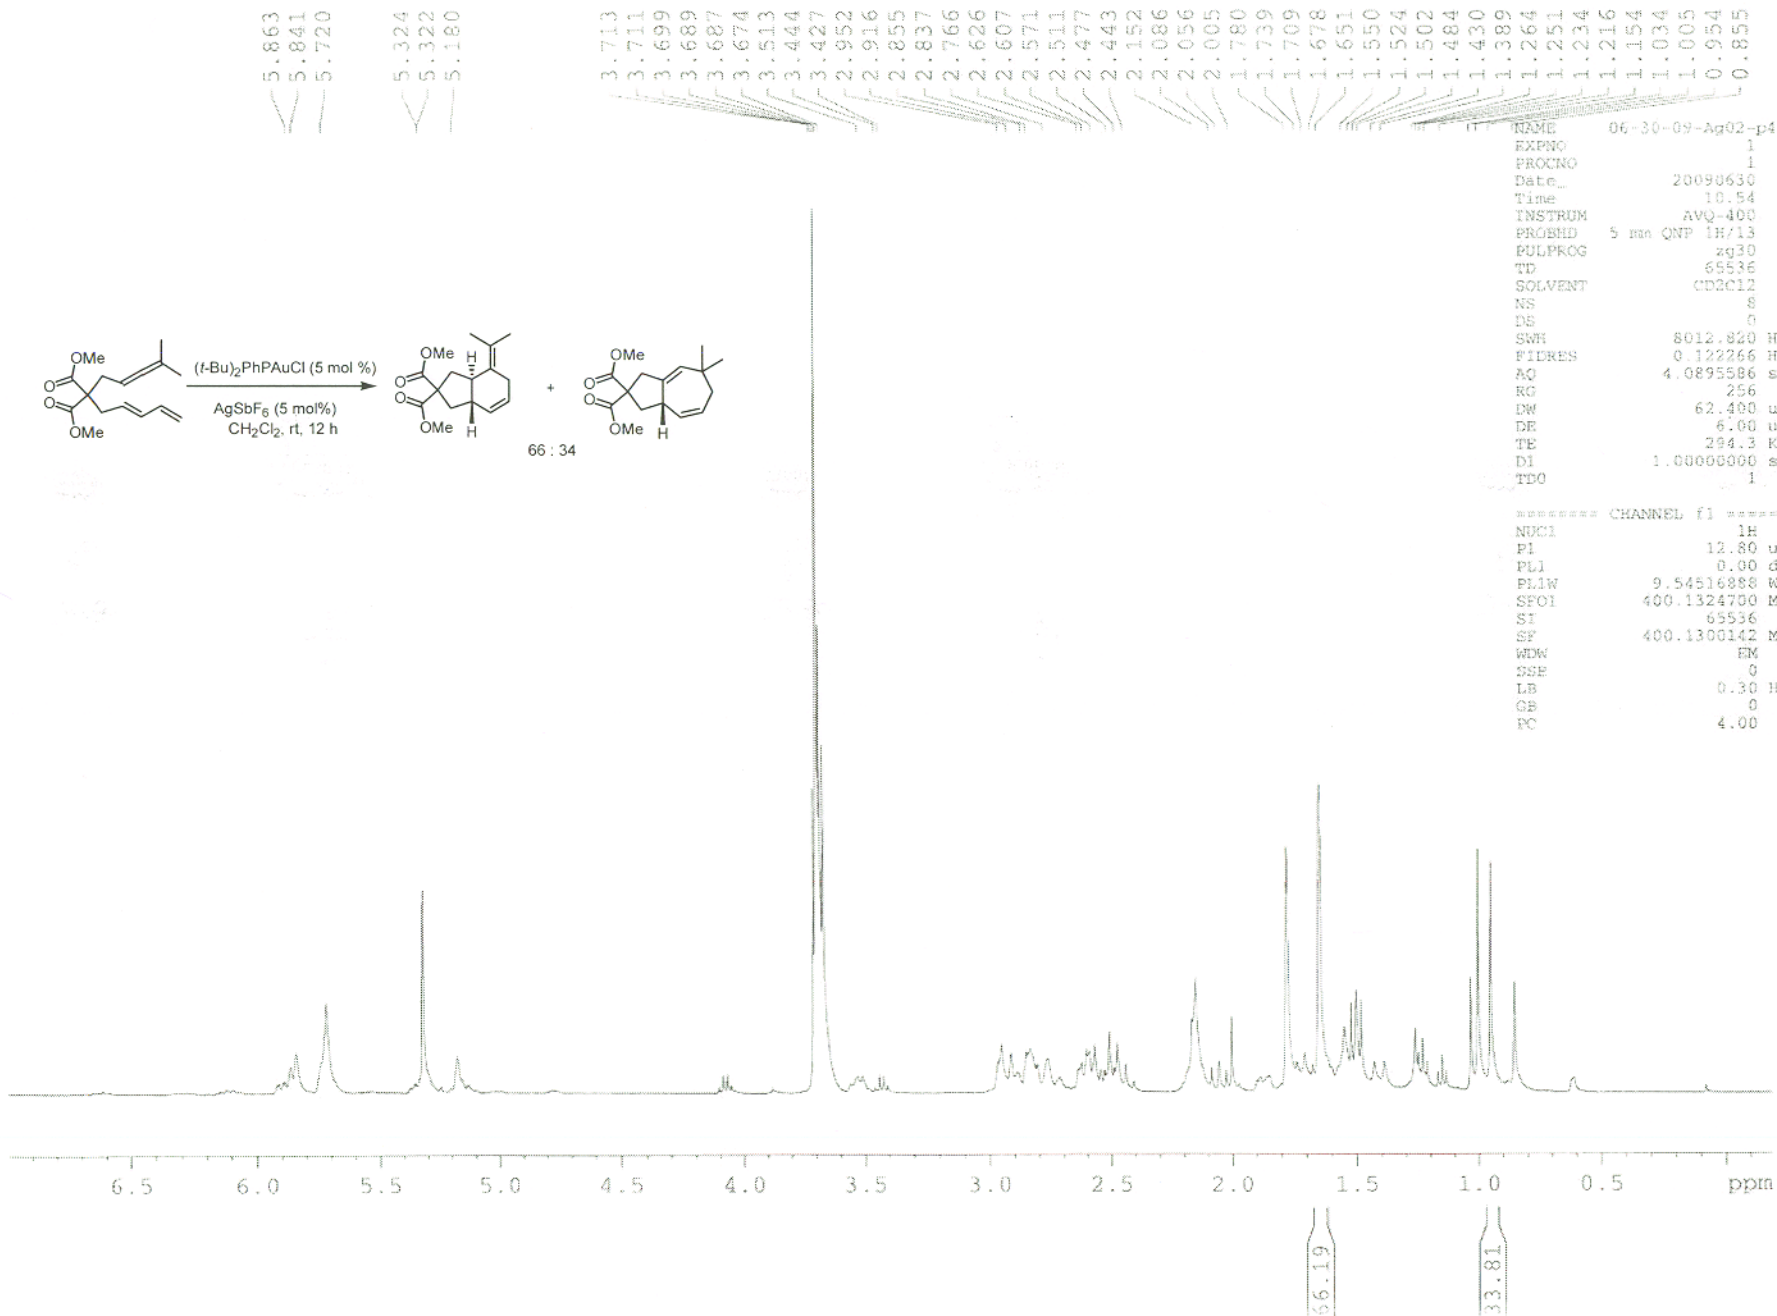



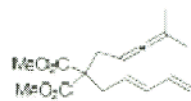

ATQ-100 QM9 - Carbon NMR parameters: 7/16/08 revised 7/22/08 JDT

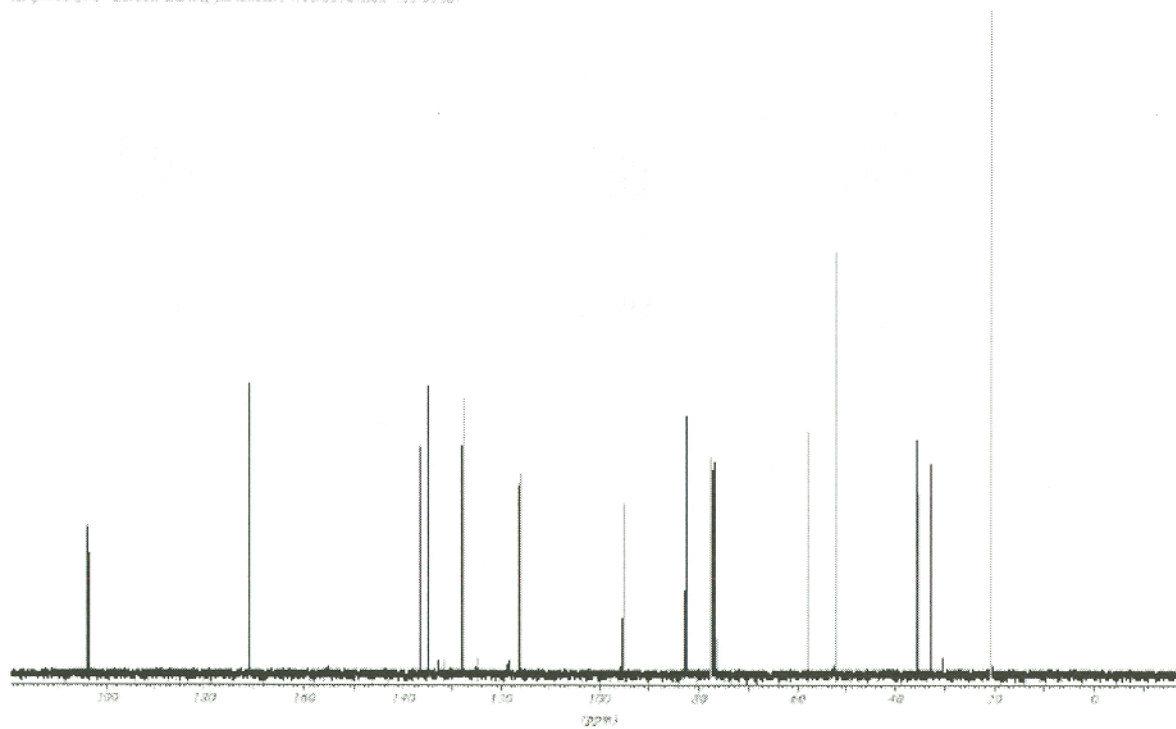

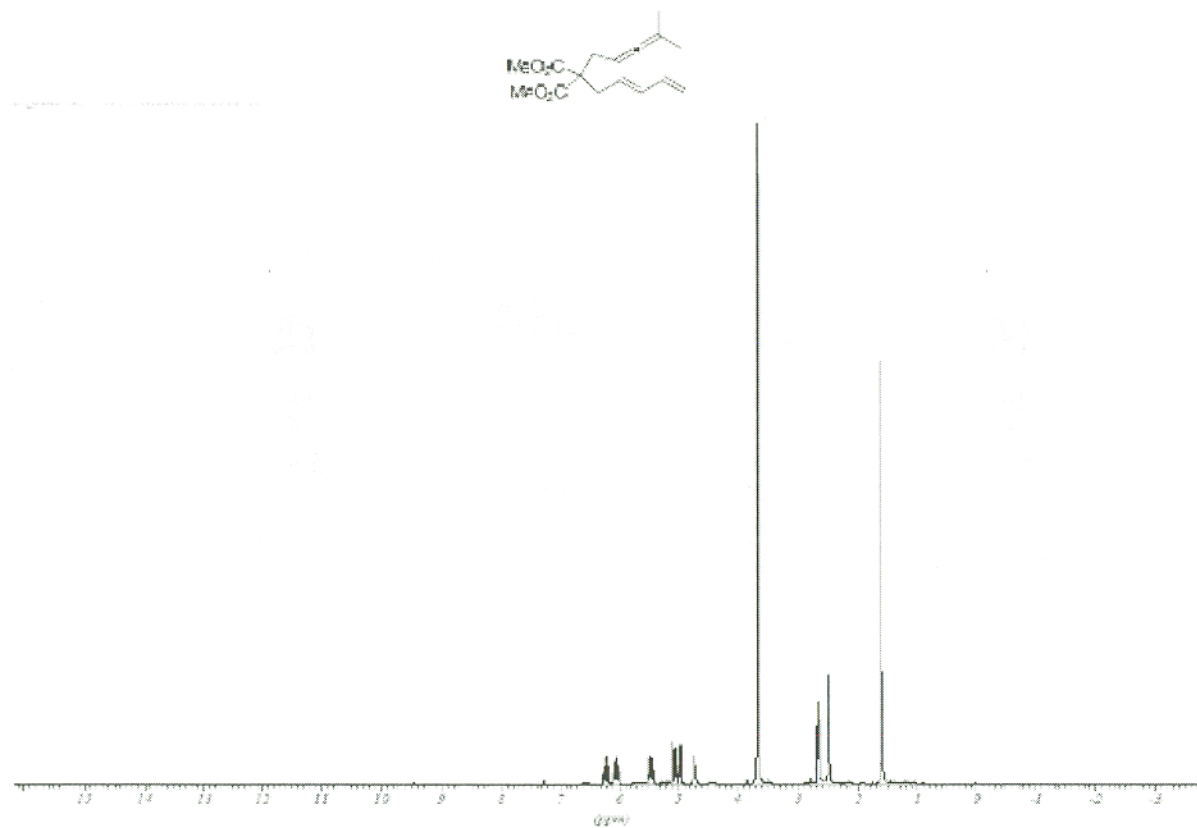

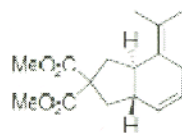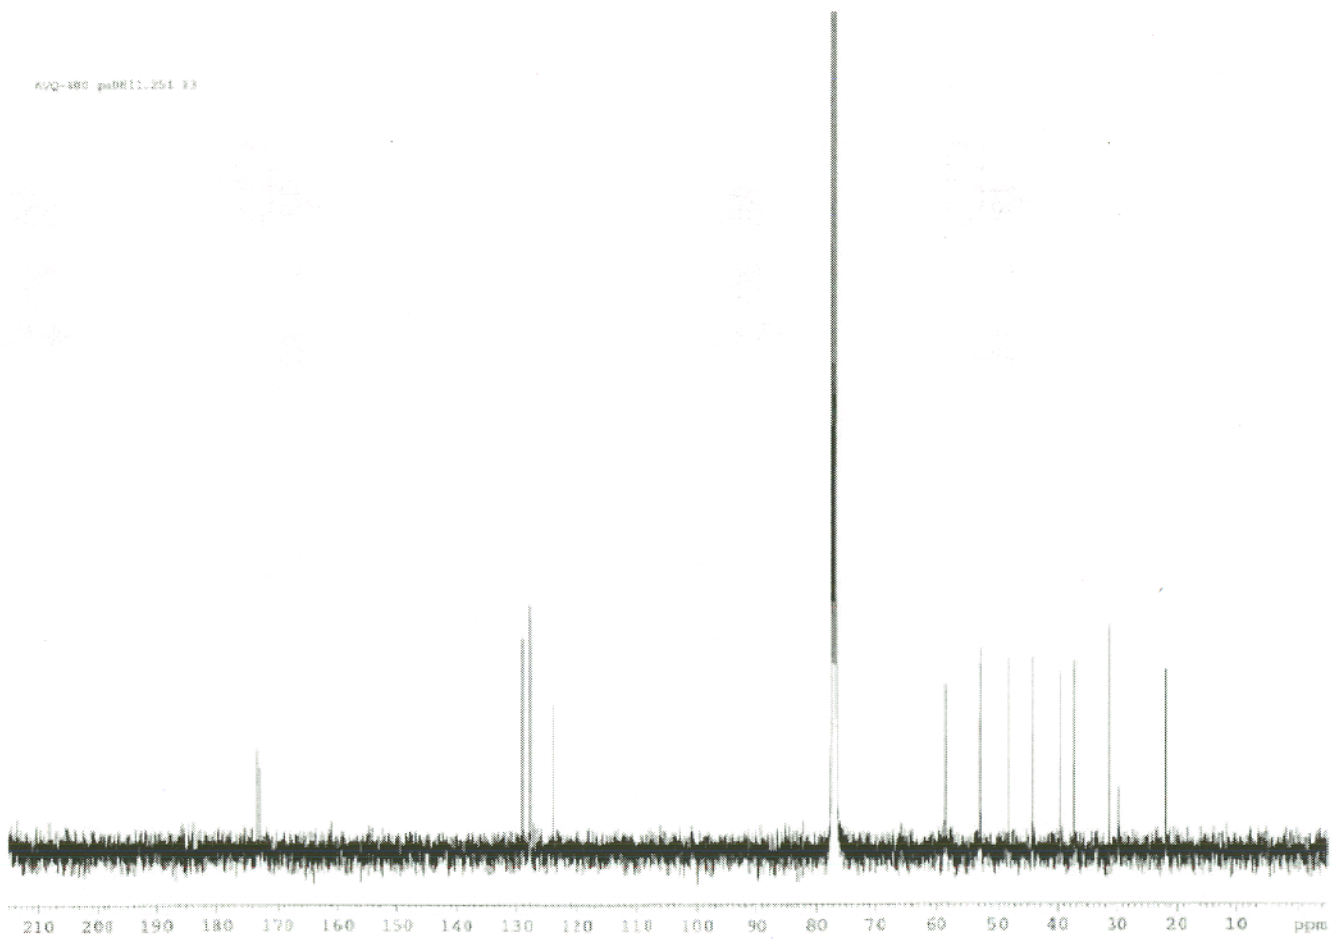

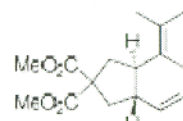

AVC-400 ps0811.252

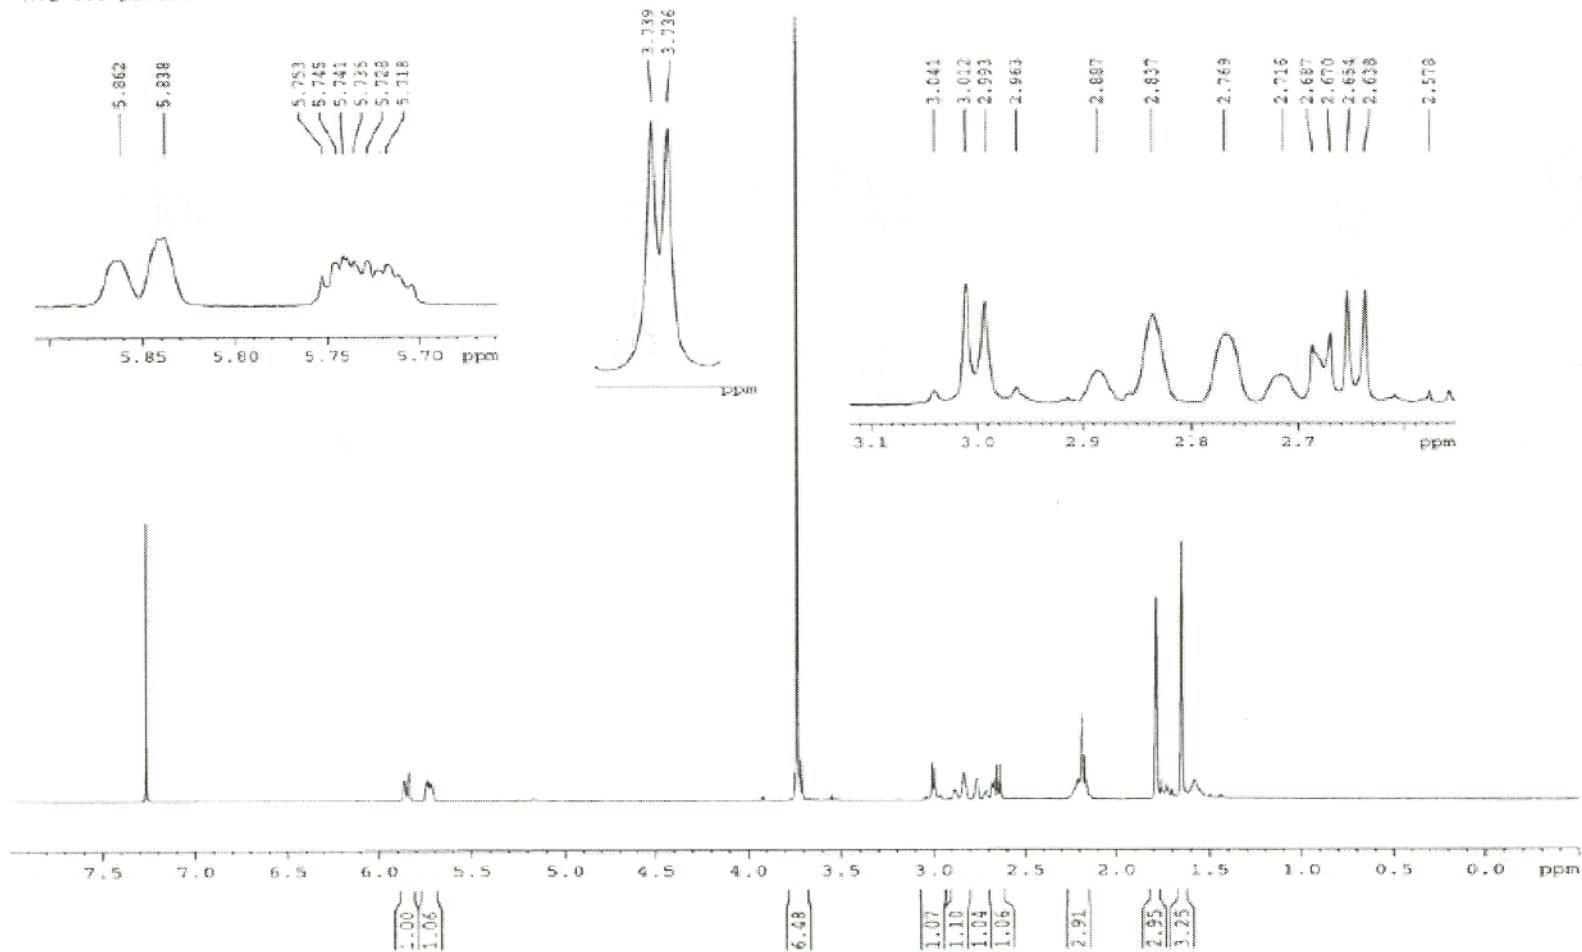

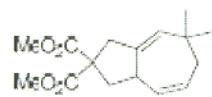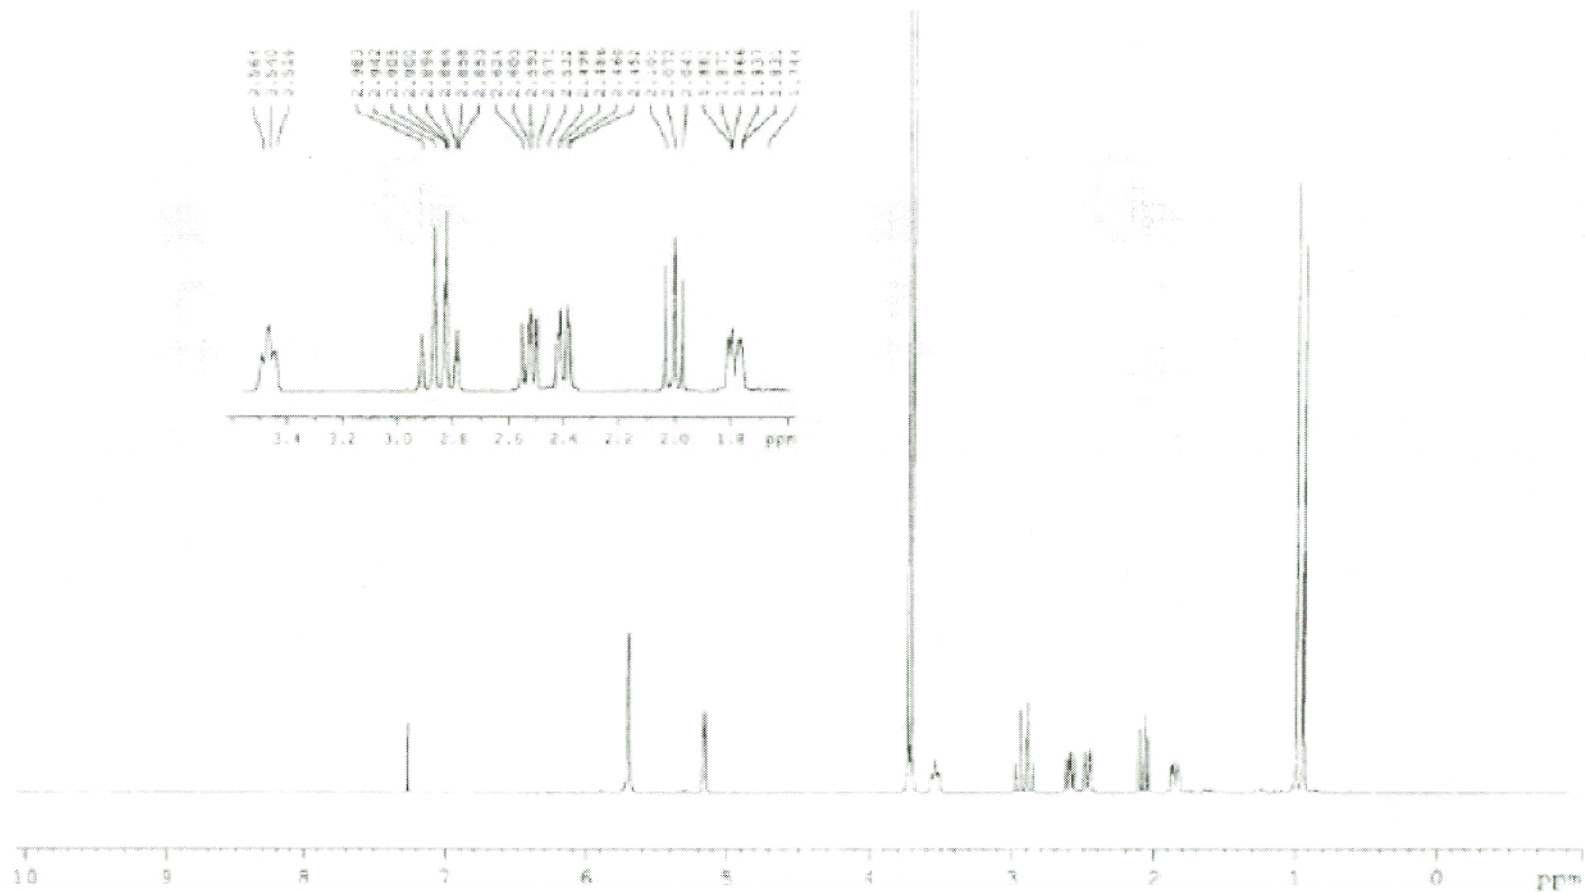

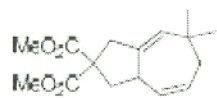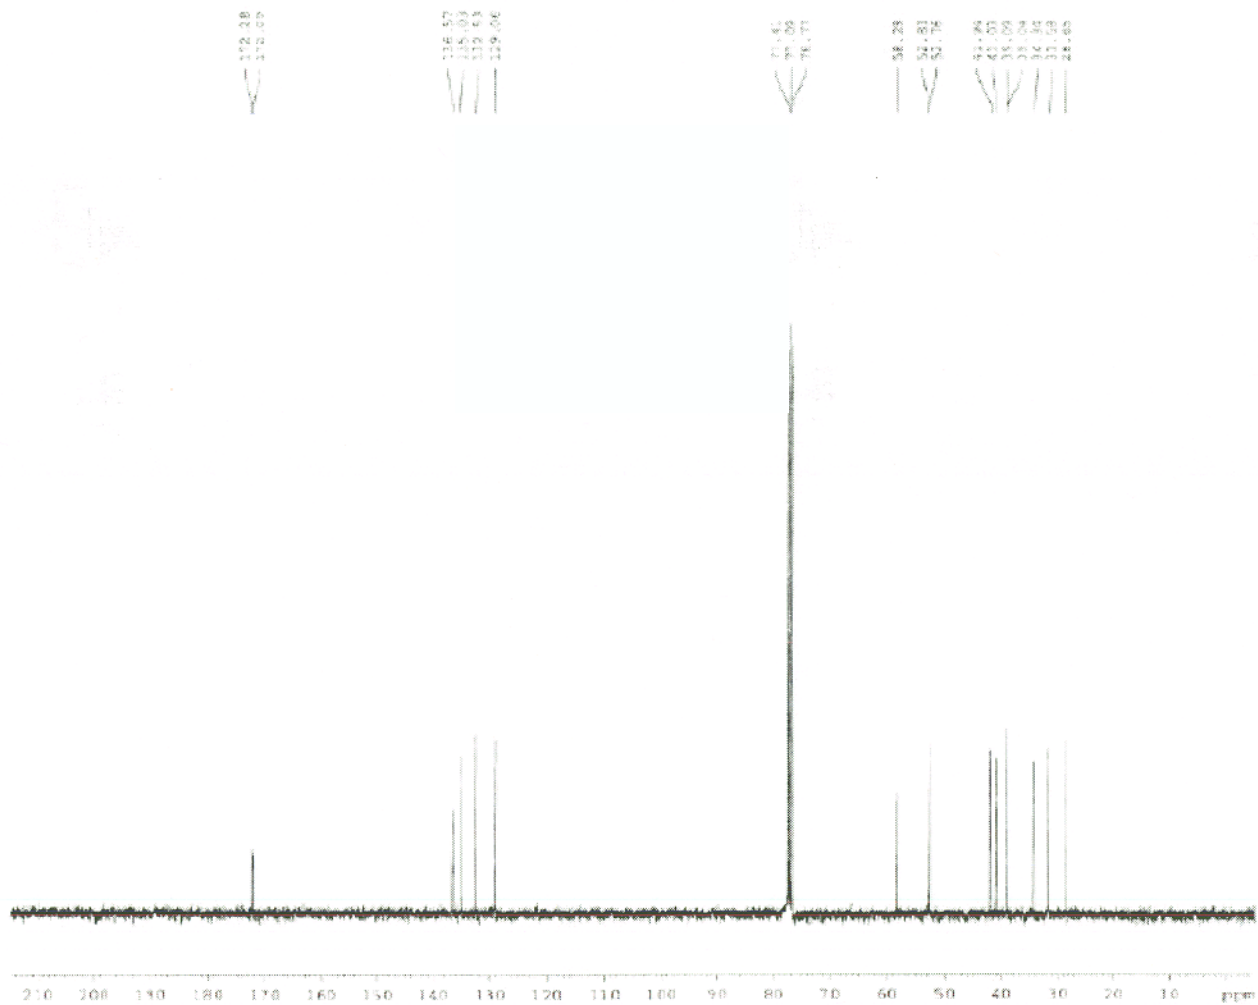

Supplement: NIHMS149287-supplement-1_si_001.pdf [file NIHMS149287-supplement-1_si_001.pdf]
